# Supplementary material for: G Protein-Coupled Receptor 15 Expression Is Associated with Myocardial Infarction
Source: MDPI journal article supplement (doi:10.3390/ijms24010180), 2022-12-22
Supplement: s1 [file s1]

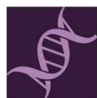

*Supplementary Materials*

# G Protein-Coupled Receptor 15 Expression Is Associated with Myocardial Infarction

Tina Haase<sup>1,2</sup>, Christian Müller<sup>1,2</sup>, Bastian Stoffers<sup>1,2</sup>, Philipp Kirn<sup>2,3</sup>, Melanie Waldenberger<sup>4,5,6</sup>, Frank J. Kaiser<sup>7</sup>, Mahir Karakas<sup>2,8</sup>, Sangwon V. Kim<sup>9</sup>, Svenja Voss<sup>1,2</sup>, Philipp S Wild<sup>10,11,12</sup>, Karl J. Lackner<sup>12,13</sup>, Jonas Andersson<sup>14</sup>, Stefan Söderberg<sup>15</sup>, Diana Lindner<sup>1,2\*,†</sup>, Tanja Zeller<sup>2,16\*,†</sup>

|            |                                                   |
|------------|---------------------------------------------------|
| Table S1:  | page 2                                            |
| Table S2:  | provided as separate Excel sheet in Supplements_2 |
| Table S3:  | page 4                                            |
| Table S4:  | page 5                                            |
| Table S5:  | page 6                                            |
| Table S6:  | page 7                                            |
| Table S7:  | page 8                                            |
| Table S8:  | page 9                                            |
| Table S9:  | provided as separate Excel sheet in Supplements_2 |
| Table S10: | page 11                                           |
|            |                                                   |
| Figure S1: | page 13                                           |
| Figure S2: | page 14                                           |
| Figure S3: | page 15                                           |
| Figure S4: | page 16                                           |
| Figure S5: | page 17                                           |
| Figure S6: | page 18                                           |
| Figure S7: | page 19                                           |

**Table S1. Study characteristics of the early-onset MI individuals and controls of the Gutenberg Young Infarction Study.**

| Characteristics                    | All           | Controls      | MI cases      |
|------------------------------------|---------------|---------------|---------------|
| n (%)                              | 224           | 112 (50)      | 112 (50)      |
| Females, n (%)                     | 72 (32)       | 36 (32)       | 36 (32)       |
| Age, years                         | 45 (42-49)    | 45 (41-49)    | 45 (42-49)    |
| Age at MI                          | 43 (40-48)    | NA            | 43 (40-48)    |
| <u>Cardiovascular risk factors</u> |               |               |               |
| Diabetes mellitus, n (%)           | 13 (6)        | 2 (2)         | 11 (10)       |
| Body mass index, kg/m <sup>2</sup> | 27 (24-32)    | 26 (23-29)    | 29 (26-33)    |
| Hypertension, n (%)                | 99 (44)       | 39 (35)       | 60 (54)       |
| Current smoker, n (%)              | 61 (27)       | 30 (27)       | 31 (28)       |
| Family history of MI, n (%)        | 47 (21)       | 10 (9)        | 37 (33)       |
| <u>Lipid status</u>                |               |               |               |
| LDL-cholesterol, mg/dl             | 120 (93-146)  | 136 (119-162) | 99 (79-121)   |
| HDL-cholesterol, mg/dl             | 46 (39-55)    | 51 (42-58)    | 42 (37-52)    |
| LDL/HDL-ratio                      | 2.5 (1.8-3.3) | 2.7 (2.2-3.4) | 2.3 (1.7-3.1) |

Continuous variables are described by median values (25<sup>th</sup> percentile to 75<sup>th</sup> percentile). Dichotomous variables are presented as total numbers (%). HDL = high-density lipoprotein, LDL=low-density lipoprotein, MI=myocardial infarction, NA=data not available

---

**Table S2. Significantly differentially expressed genes between 112 early-onset MI patients and sex- and age-matched controls from the GIS discovery cohort.**

Table S2 is provided at the end of this file

**Table S3. Study characteristics of the early-onset MI patients and controls of the MIYoung study.**

| Characteristics                    | All           | Controls      | MI cases      |
|------------------------------------|---------------|---------------|---------------|
| n (%)                              | 376           | 185 (49)      | 191 (51)      |
| Females, n (%)                     | 23 (6)        | 0 (0)         | 23 (12)       |
| Age, years                         | 65 (48-70)    | 70 (67-73)    | 48 (43-51)    |
| Age at MI                          | 44 (39-47)    | NA            | 44 (39-47)    |
| Cardiovascular risk factors        |               |               |               |
| Diabetes mellitus, n (%)           | 39 (10)       | 16 (9)        | 23 (12)       |
| Body mass index, kg/m <sup>2</sup> | 27 (24-29)    | 26 (24-28)    | 28 (25-31)    |
| Hypertension, n (%)                | 155 (41)      | 66 (36)       | 89 (47)       |
| Current smoker, n (%)              | 55 (15)       | 8 (4)         | 47 (25)       |
| Family history of MI, n (%)        | 106 (28)      | 29 (16)       | 77 (40)       |
| Lipid status                       |               |               |               |
| LDL-cholesterol, mg/dl             | 99 (74-125)   | 115 (93-137)  | 82 (55-103)   |
| HDL-cholesterol, mg/dl             | 48 (41-60)    | 56 (46-66)    | 43 (36-51)    |
| LDL/HDL-ratio                      | 1.9 (1.4-2.5) | 2.0 (1.5-2.5) | 1.8 (1.2-2.3) |

Continuous variables are described by median values (25th percentile to 75th percentile). Dichotomous variables are presented as total numbers (%). HDL = high-density lipoprotein, LDL=low-density lipoprotein, MI=myocardial infarction, NA=data not available

**Table S4. Study characteristics of incident MI individuals and controls of the FIA2 cohort.**

| Characteristics       | All        | Controls   | MI cases   |
|-----------------------|------------|------------|------------|
| n (%)                 | 855        | 560 (65)   | 295 (35)   |
| Females, n (%)        | 146 (17)   | 94 (17)    | 52 (18)    |
| Age, years            | 53 (50-60) | 53 (50-60) | 54 (50-60) |
| Age at MI             | 57 (52-64) | NA         | 57 (52-64) |
| Current smoker, n (%) | 252 (29)   | 118 (21)   | 134 (45)   |

Continuous variables are described by median values (25th percentile to 75th percentile). Dichotomous variables are presented as total numbers (%). MI=myocardial infarction, NA=data not available

**Table S5. Incident myocardial infarction risk predicted by *GPR15* DNA methylation sites in the FIA2 study.**

| DNA methylation site | Hazard ratio | 95% CI      | p value |
|----------------------|--------------|-------------|---------|
| CpG1                 | 0.988        | 0.973-1.004 | 0.3909  |
| CpG2                 | 0.993        | 0.982-1.004 | 0.6456  |
| CpG3                 | 0.993        | 0.987-0.999 | 0.0549  |
| Adjusted for smoking |              |             |         |
| CpG1                 | 0.989        | 0.974-1.005 | 0.5685  |
| CpG2                 | 0.989        | 0.977-1.000 | 0.1812  |
| CpG3                 | 0.992        | 0.986-0.998 | 0.0177  |

Mixed effect Cox models, adjusted for age and sex, significance after Bonferroni correction, CI=confidence interval

**Table S6. Study characteristics of the MIYoung study individuals selected for *GPR15* sequencing.**

| Characteristics                    | Controls      | MI cases      |
|------------------------------------|---------------|---------------|
| n (%)                              | 32            | 32            |
| Females, n (%)                     | 32 (100)      | 32 (100)      |
| Age, years                         | 75 (71-76)    | 42 (38-49)    |
| Age at MI                          | NA            | 38 (34-39)    |
| <u>Cardiovascular risk factors</u> |               |               |
| Diabetes mellitus, n (%)           | 3 (9)         | 5 (16)        |
| Body mass index, kg/m <sup>2</sup> | 25 (24-28)    | 29 (27-33)    |
| Hypertension, n (%)                | 15 (47)       | 18 (56)       |
| Current smoker, n (%)              | 2 (6)         | 9 (28)        |
| Family history of MI, n (%)        | 16 (50)       | 16 (50)       |
| <u>Lipid status</u>                |               |               |
| LDL-cholesterol, mg/dl             | 113 (87-139)  | 87 (63-105)   |
| HDL-cholesterol, mg/dl             | 55 (49-66)    | 45 (34-49)    |
| LDL/HDL-ratio                      | 1.8 (1.4-2.5) | 2.0 (1.6-2.6) |

Continuous variables are described by median values (25th percentile to 75th percentile). Dichotomous variables are presented as total numbers (%). HDL = high-density lipoprotein, LDL=low-density lipoprotein, MI=myocardial infarction, NA=data not available

**Table S7. Associations between *GPR15* DNA methylation and rs2230344 minor T allele in the MIYoung study.**

| DNA methylation site | Effect | Standard error | p value |
|----------------------|--------|----------------|---------|
| CpG1                 | 1.157  | 0.748          | 0.3690  |
| CpG2                 | 0.690  | 1.289          | 1.7790  |
| CpG3                 | 2.846  | 1.356          | 0.1083  |
| Adjusted for smoking |        |                |         |
| CpG1                 | 0.972  | 0.749          | 0.5850  |
| CpG2                 | 1.292  | 1.293          | 0.9540  |
| CpG3                 | 2.821  | 1.367          | 0.1182  |

Linear mixed models with CpG methylation status as dependent and rs2230344 allele dosage as independent variable, adjusted for age and sex, effect=% difference per T allele, CI=confidence interval



**Table S8. Risk prediction of incident myocardial infarction by rs2230344 minor T allele in the FIA2 cohort.**

| Subjects           | Hazard ratio | 95% CI      | p value |
|--------------------|--------------|-------------|---------|
| All                | 0.947        | 0.757-1.185 | 0.6352  |
| Never smokers only | 0.837        | 0.544-1.288 | 0.4191  |
| Ever smokers only  | 1.044        | 0.801-1.360 | 0.7522  |

Mixed effect Cox models, adjusted for age and sex, CI=confidence interval

**Table S9. Significantly differentially expressed genes between *Gpr15<sup>gfp/gfp</sup>* and wildtype mice in the myocardial infarction zone.**

Table S9 is provided at the end of this file

Table S10. Cohort description.

1

|                                        | GIS [32–36]                                                                                                                                                                                                                                                                                                                                  | MIYoung                                                                                                                                                                                                                                                                                                                                      | FIA2 [37, 38]                                                                                                                                                                                                                                              |
|----------------------------------------|----------------------------------------------------------------------------------------------------------------------------------------------------------------------------------------------------------------------------------------------------------------------------------------------------------------------------------------------|----------------------------------------------------------------------------------------------------------------------------------------------------------------------------------------------------------------------------------------------------------------------------------------------------------------------------------------------|------------------------------------------------------------------------------------------------------------------------------------------------------------------------------------------------------------------------------------------------------------|
| Rationale                              | Discovery                                                                                                                                                                                                                                                                                                                                    | Replication                                                                                                                                                                                                                                                                                                                                  | Risk prediction                                                                                                                                                                                                                                            |
| Study design                           | Restrospective case-control study                                                                                                                                                                                                                                                                                                            | Retrospective case-control study                                                                                                                                                                                                                                                                                                             | Prospective cohort/retrospective case-control study                                                                                                                                                                                                        |
| Country                                | Germany                                                                                                                                                                                                                                                                                                                                      | Germany                                                                                                                                                                                                                                                                                                                                      | Sweden                                                                                                                                                                                                                                                     |
| Ethnicity                              | Caucasian                                                                                                                                                                                                                                                                                                                                    | Caucasian                                                                                                                                                                                                                                                                                                                                    | Caucasian                                                                                                                                                                                                                                                  |
| Cases                                  | <ul style="list-style-type: none"> <li>○ Prevalent early onset MI</li> <li>○ n = 234</li> </ul>                                                                                                                                                                                                                                              | <ul style="list-style-type: none"> <li>○ Prevalent early onset MI</li> <li>○ n = 191</li> </ul>                                                                                                                                                                                                                                              | <ul style="list-style-type: none"> <li>○ Incident MI</li> <li>○ n = 295</li> </ul>                                                                                                                                                                         |
| Case definition                        | <ul style="list-style-type: none"> <li>○ Confirmed MI (positive ECG, increase in biomarkers of cardiac necrosis (troponin, creatine-kinase MB), or clinical symptoms) and proven by coronary angiography</li> <li>○ Age at MI ≤50 years</li> <li>○ Stable disease conditions for at least three months before study participation</li> </ul> | <ul style="list-style-type: none"> <li>○ Confirmed MI (positive ECG, increase in biomarkers of cardiac necrosis (troponin, creatine-kinase MB), or clinical symptoms) and proven by coronary angiography</li> <li>○ Age at MI ≤50 years</li> <li>○ Stable disease conditions for at least three months before study participation</li> </ul> | <ul style="list-style-type: none"> <li>○ MI events were identified through screening of hospital discharge records, general practitioners' reports, and death certificates.</li> <li>○ Age at MI = 34–71 years</li> <li>○ No prevalent MI cases</li> </ul> |
| Eligible controls                      | <ul style="list-style-type: none"> <li>○ No manifest cardiovascular disease</li> <li>○ n = 419</li> </ul>                                                                                                                                                                                                                                    | <ul style="list-style-type: none"> <li>○ No manifest cardiovascular disease</li> <li>○ Age &gt; 65 years</li> <li>○ n = 185</li> </ul>                                                                                                                                                                                                       | <ul style="list-style-type: none"> <li>○ No prevalent and incident MI</li> <li>○ n = 560</li> </ul>                                                                                                                                                        |
| Matching criteria                      | <ul style="list-style-type: none"> <li>○ Sex</li> <li>○ Age</li> </ul>                                                                                                                                                                                                                                                                       | -                                                                                                                                                                                                                                                                                                                                            | <ul style="list-style-type: none"> <li>○ Sex</li> <li>○ Age</li> <li>○ Date of health examination</li> <li>○ Geographical region</li> </ul>                                                                                                                |
| Number of controls per case            | 1                                                                                                                                                                                                                                                                                                                                            | -                                                                                                                                                                                                                                                                                                                                            | 2                                                                                                                                                                                                                                                          |
| Number of matched samples for analyses | 112 (112 cases, 112 controls)                                                                                                                                                                                                                                                                                                                | -                                                                                                                                                                                                                                                                                                                                            | 170 (170 cases, 340 controls)                                                                                                                                                                                                                              |
| Samples                                | <ul style="list-style-type: none"> <li>○ Smoking (self-reported)</li> <li>○ RNA from PBMCs</li> <li>○ DNA from leukocytes</li> </ul>                                                                                                                                                                                                         | <ul style="list-style-type: none"> <li>○ Smoking (self-reported)</li> <li>○ RNA from PBMCs</li> <li>○ DNA from leukocytes</li> </ul>                                                                                                                                                                                                         | <ul style="list-style-type: none"> <li>○ Smoking (self-reported)</li> <li>○ DNA from whole blood</li> </ul>                                                                                                                                                |

|                  |                                                                                                                                                                                                                                                                        |                                                                                                                   |                                                                                                                                                                |
|------------------|------------------------------------------------------------------------------------------------------------------------------------------------------------------------------------------------------------------------------------------------------------------------|-------------------------------------------------------------------------------------------------------------------|----------------------------------------------------------------------------------------------------------------------------------------------------------------|
| Ethical approval | local ethics committee of the Medical Chamber of Rhineland-Palatinate, Germany (ethical approval code 837.020.07 (5555))                                                                                                                                               | local ethics committee of the University Medical Center Hamburg-Eppendorf, Germany (ethical approval code PV4137) | local ethics committee (Dnr 05-142M, with additional review in 2009-01-19)                                                                                     |
| Funding          | Government of Rhineland-Palatinate (“Stiftung Rheinland-Pfalz für Innovation”), grant AZ 961-386261/733; “Wissen schafft Zukunft”; Johannes Gutenberg-University of Mainz “Center for Translational Vascular Biology”; Boehringer Ingelheimer, PHILIPS Medical Systems | -                                                                                                                 | Swedish Heart and Lung Foundation; Gustaf Sjölund Foundation; Country councils of Northern Sweden (Visare Norr) and the Faculty of Medicine of Umeå University |

MI = myocardial infarction, PBMCs = peripheral blood mononuclear cells

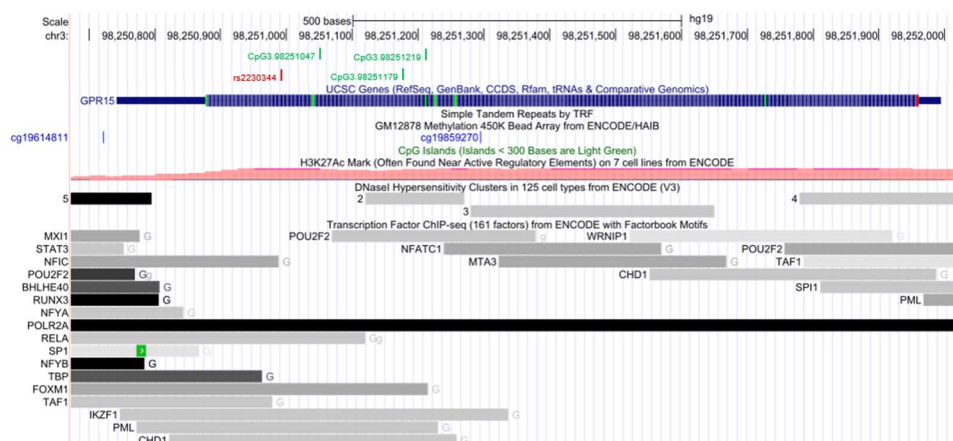

**Figure S1. The *GPR15* locus in the UCSC genome browser.** The *GPR15* locus depicted in UCSC Genome Browser on Human Feb. 2009 (GRCh37/hg19) Assembly, showing the *GPR15* gene, *GPR15* DNA methylation sites and rs2230344 SNP in close proximity to each other. <http://genome.ucsc.edu/>, 02/04/2020.

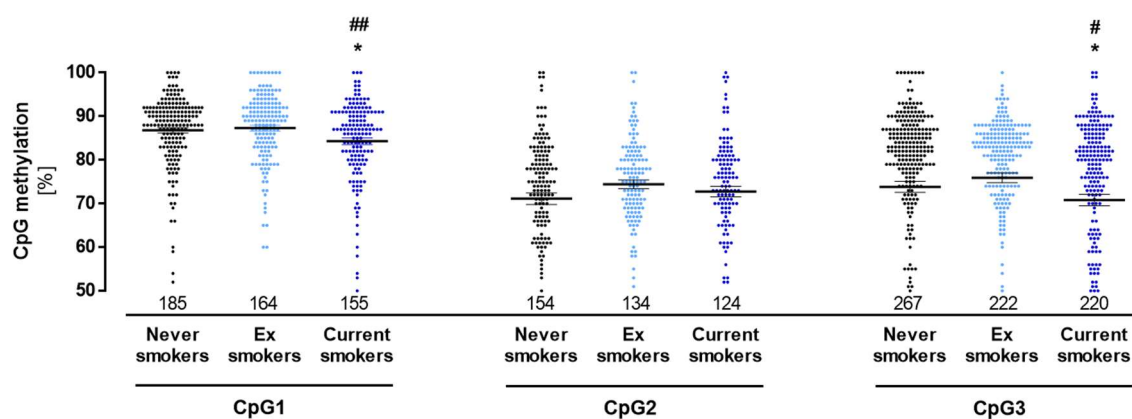

**Figure S2. Increased *GPR15* expression and decreased *GPR15* DNA methylation in smokers.** In the FIA2 study, *GPR15* DNA methylation was significantly lower in current smokers compared to never smokers and ex smokers for the CpG1 site ( $p < 0.05$  and  $p < 0.01$ ) and for the CpG3site ( $p < 0.05$ ). Kruskal-Wallis test with Dunns multiple comparison; significance threshold=0.0167 for Bonferroni correction, \*/#= $p < 0.05$ , ##= $p < 0.01$  compared to the respective never smokers group/ ex smokers group; Data are shown as mean  $\pm$  standard error of the mean.

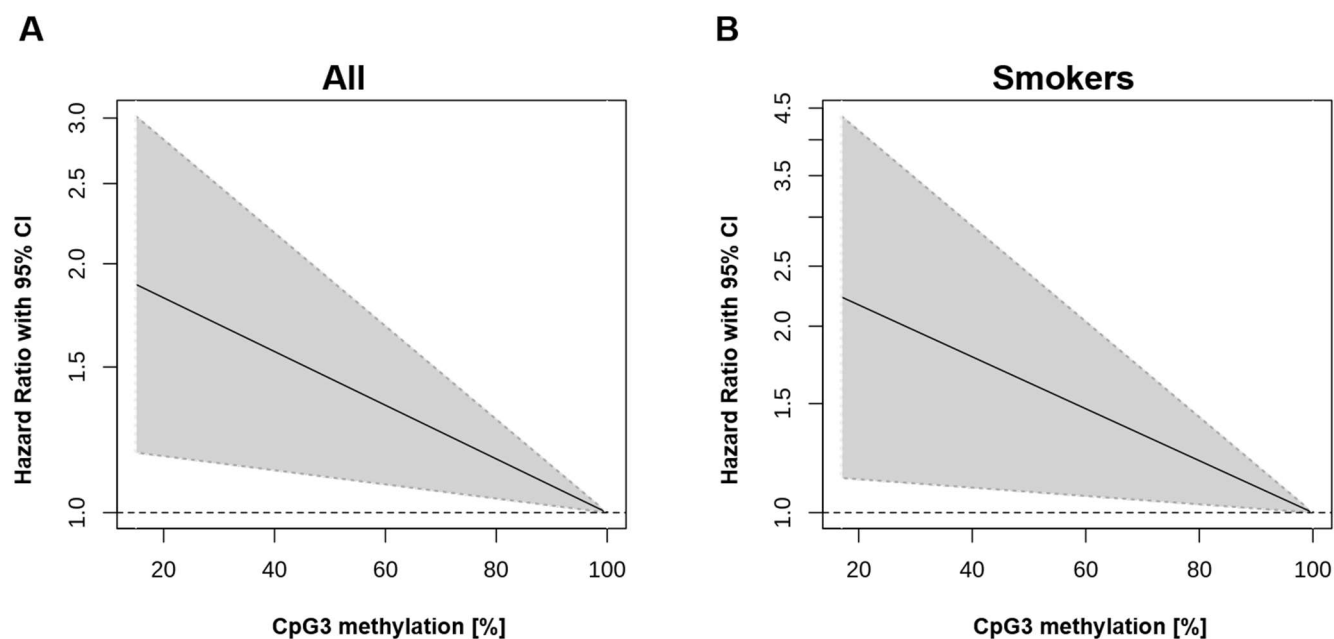

**Figure S3. Prediction of risk of incident myocardial infarction by *GPR15* DNA methylation in the FIA2 study.** CpG3 methylation significantly predicted the risk for incident MI after adjustment for smoking (HR=0.992,  $p=0.0177$ ). MI risk was lower in individuals with higher CpG3 DNA methylation levels compared to individuals with lower CpG3 DNA methylation levels. This was shown in the overall cohort (A) as well as in smokers only (B). *R* package *smoothHR*, Full CpG3 site methylation (100%) was used as reference. Grey areas represent 95% confidence intervals (CI).

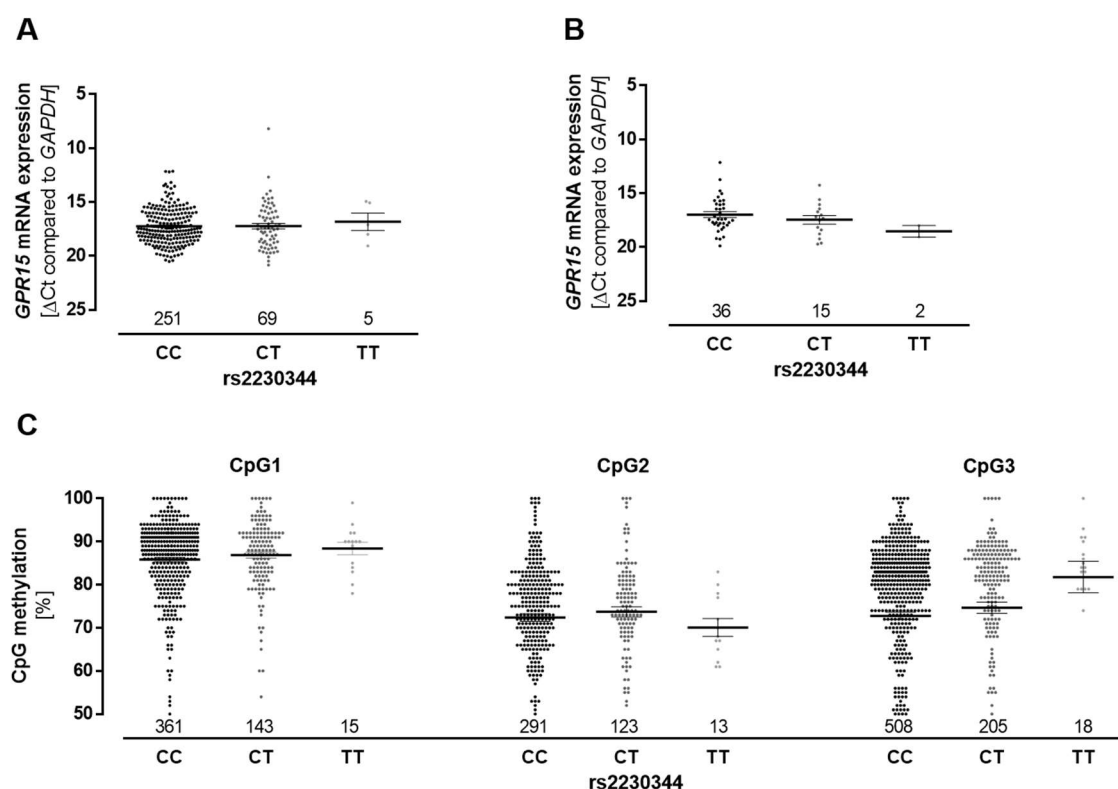

**Figure S4. rs2230344 genotype is not associated with *GPR15* DNA methylation or *GPR15* mRNA expression.** (A/B) In the MIYoung study, rs2230344 SNP genotype was not significantly associated with *GPR15* mRNA expression in all individuals (A) or individuals with sequenced genotypes only (B). *GPR15* mRNA expression is depicted as  $\Delta$ Ct values normalized to glyceraldehyde 3-phosphate dehydrogenase (*GAPDH*) mRNA expression. Lower  $\Delta$ Ct values indicate higher *GPR15* mRNA expression. (C) In the FIA2 study, *GPR15* DNA methylation of the CpG3 site was not significantly associated with rs2230344 genotype.  $n=13$ -508, linear mixed model, adjusted for age and sex; significance after Bonferroni correction Data are shown as mean $\pm$ standard error of the mean.



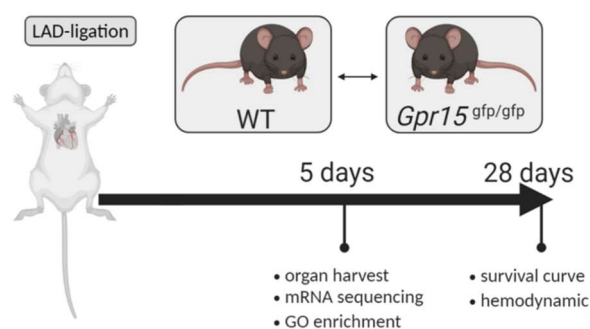

**Figure S5. Overview *Gpr15<sup>gfp/gfp</sup>* mice.** *Gpr15<sup>gfp/gfp</sup>* and wildtype (WT) mice were subjected to left anterior descending artery (LAD) ligation and either mRNA sequencing of the infarct zone (IZ) was performed 5 days after ligation or survival was determined 28 days after ligation.

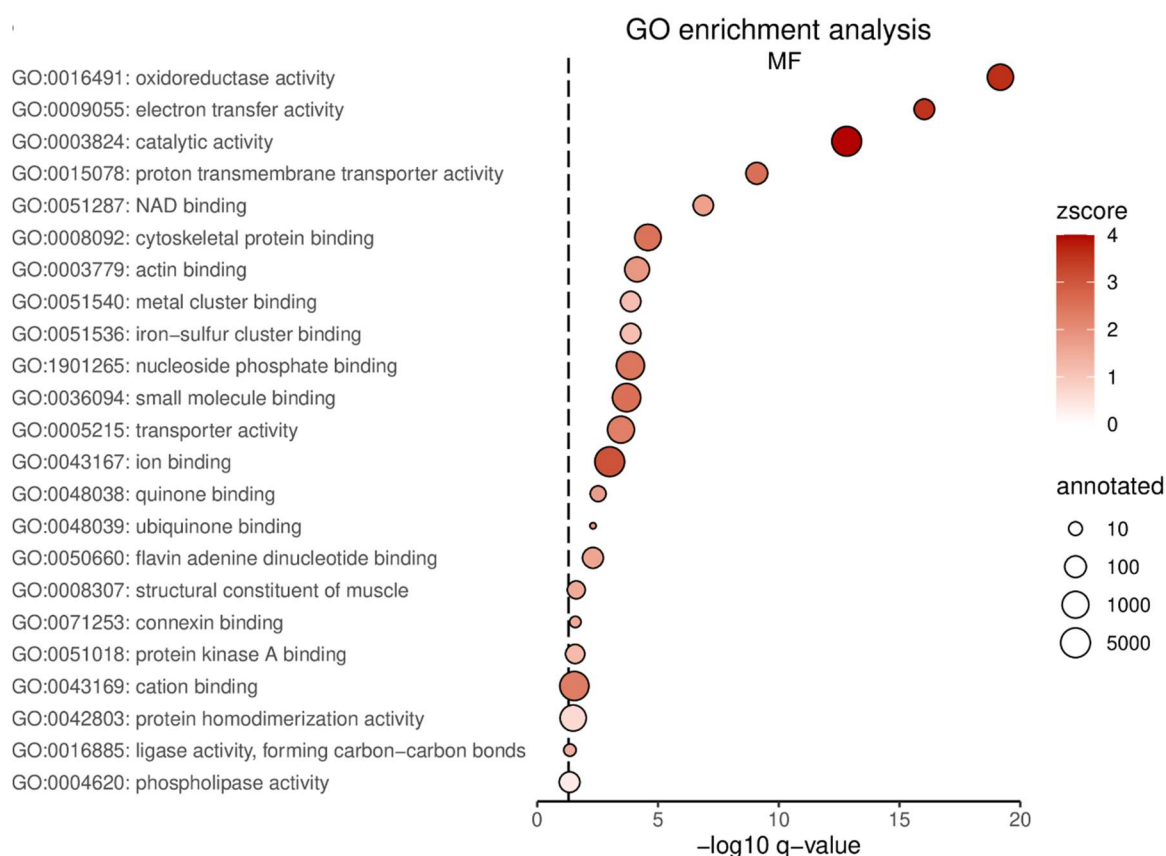

**Figure S6. Altered GO terms for molecular functions in *Gpr15<sup>gfp/gfp</sup>* mice.** Gene expression measured by 3' mRNA sequencing of cardiac tissue from the IZ from 9 Bl6 wildtype (WT) and 8 *Gpr15<sup>gfp/gfp</sup>* mice 5 days after MI surgery. Gene Ontology (GO) terms are displayed for molecular functions (MF).

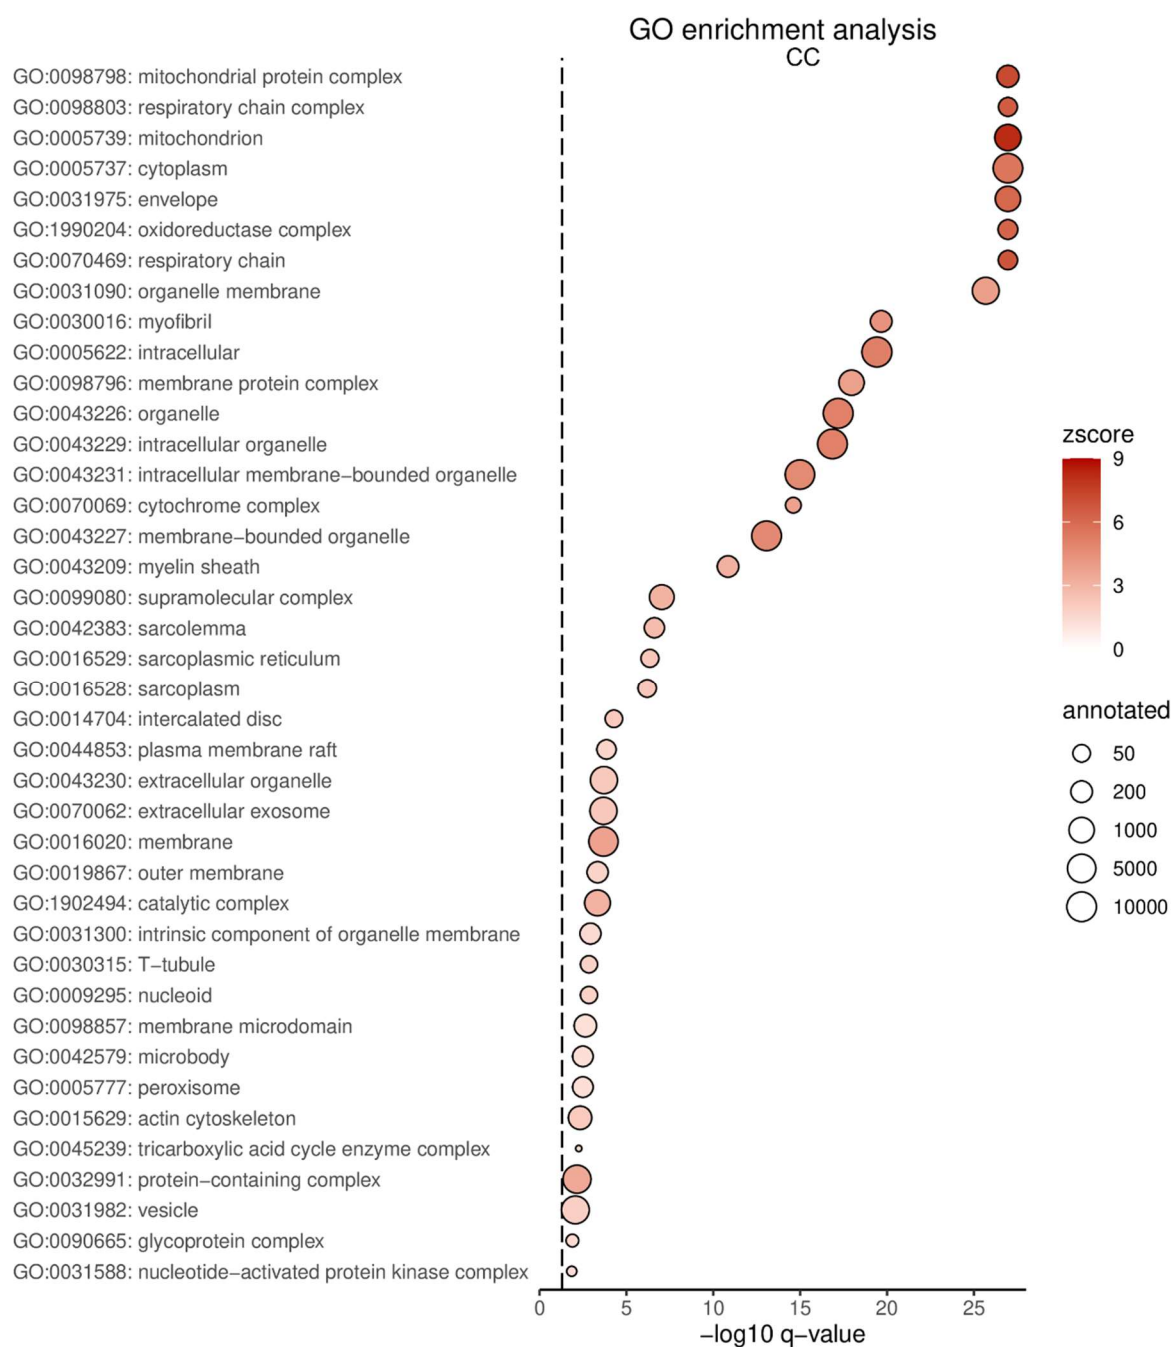

**Figure S7. Altered GO terms for cellular components in *Gpr15<sup>gfp/gfp</sup>* mice.** Gene expression measured by 3' mRNA sequencing of cardiac tissue from the IZ from 9 Bl6 wildtype (WT) and 8 *Gpr15<sup>gfp/gfp</sup>* mice 5 days after MI surgery. Gene Ontology (GO) terms are displayed for cellular components (CC).

Table S2: Significantly differentially expressed genes between 112 early-onset MI patients and sex- and age-matched controls from the GIS discovery cohort.

| gene            | Ensembl_id      | FC        | p-value  | q-value  | gene description                                                  |
|-----------------|-----------------|-----------|----------|----------|-------------------------------------------------------------------|
| GPR15           | ENSG00000154165 | 1.43E+00  | 1.87E-07 | 2.88E-03 | G protein-coupled receptor 15                                     |
| ABCA1           | ENSG00000165029 | -1.14E+00 | 4.54E-07 | 3.51E-03 | ATP-binding cassette, sub-family A (ABC1), member 1               |
| SELO            | ENSG00000073169 | -1.18E+00 | 1.35E-06 | 6.05E-03 | selenoprotein O                                                   |
| CTF1            | ENSG00000150281 | 1.15E+00  | 1.61E-06 | 6.05E-03 | cardiotrophin 1                                                   |
| DUSP1           | ENSG00000120129 | -1.34E+00 | 2.19E-06 | 6.05E-03 | dual specificity phosphatase 12 (EC:3.1.3.16 3.1.3.48)            |
| DNM2            | ENSG00000079805 | -1.08E+00 | 2.35E-06 | 6.05E-03 | dynamitin 2 (EC:3.6.5.5)                                          |
| DYNLL2          | ENSG00000121083 | -1.14E+00 | 4.05E-06 | 7.37E-03 | dynein, light chain, LC8-type 2                                   |
| CMIP            | ENSG00000153815 | -1.11E+00 | 4.25E-06 | 7.37E-03 | CMIP                                                              |
| TMEM127         | ENSG00000135956 | -1.14E+00 | 4.29E-06 | 7.37E-03 | transmembrane protein 127                                         |
| GALT            | ENSG00000213930 | 1.09E+00  | 5.36E-06 | 8.28E-03 | galactose-1-phosphate uridylyltransferase (EC:2.7.7.12)           |
| CLK3            | ENSG00000179335 | 1.09E+00  | 7.80E-06 | 9.42E-03 | CDC-like kinase 3 (EC:2.7.12.1)                                   |
| IGF2R           | ENSG00000197081 | -1.09E+00 | 7.96E-06 | 9.42E-03 | insulin-like growth factor 2 receptor                             |
| ADCY7           | ENSG00000121281 | -1.08E+00 | 8.00E-06 | 9.42E-03 | adenylate cyclase 7 (EC:4.6.1.1)                                  |
| ST6GALNAC3      | ENSG00000184005 | -1.13E+00 | 9.63E-06 | 9.42E-03 | ST6                                                               |
| PIK3CD          | ENSG00000171608 | -1.06E+00 | 9.75E-06 | 9.42E-03 | phosphoinositide-3-kinase, catalytic, delta polypeptide           |
| MERTK           | ENSG00000153208 | -1.18E+00 | 1.03E-05 | 9.42E-03 | c-mer proto-oncogene tyrosine kinase (EC:2.7.10.1)                |
| SIPA1L1         | ENSG00000197555 | -1.12E+00 | 1.09E-05 | 9.42E-03 | signal-induced proliferation-associated 1 like 1                  |
| HIP1R           | ENSG00000130787 | 1.09E+00  | 1.10E-05 | 9.42E-03 | huntingtin interacting protein 1 related                          |
| HDAC9           | ENSG00000048052 | 1.08E+00  | 1.22E-05 | 9.90E-03 | histone deacetylase 9 (EC:3.5.1.98)                               |
| C1orf38         | ENSG00000130775 | -1.17E+00 | 1.30E-05 | 1.01E-02 | chromosome 1 open reading frame 38                                |
| SPRNP1          | ENSG00000230786 | -1.10E+00 | 1.46E-05 | 1.02E-02 | NA                                                                |
| SPTAN1          | ENSG00000197694 | 1.09E+00  | 1.51E-05 | 1.02E-02 | spectrin, alpha, non-erythrocytic 1 (alpha-fodrin)                |
| EPHA4           | ENSG00000116106 | 1.13E+00  | 1.52E-05 | 1.02E-02 | EPH receptor A4 (EC:2.7.10.1)                                     |
| XXbac-B461K10.4 | ENSG00000093100 | 1.09E+00  | 1.77E-05 | 1.07E-02 | NA                                                                |
| OSGEP           | ENSG00000092094 | 1.09E+00  | 1.80E-05 | 1.07E-02 | O-sialoglycoprotein endopeptidase (EC:3.4.24.57)                  |
| BASP1           | ENSG00000176788 | -1.12E+00 | 1.80E-05 | 1.07E-02 | brain abundant, membrane attached signal protein 1                |
| SLC11A1         | ENSG00000018280 | -1.16E+00 | 2.57E-05 | 1.47E-02 | solute carrier family 11 (proton-coupled divalent metal ion       |
| PPP1R15B        | ENSG00000158615 | -1.09E+00 | 2.84E-05 | 1.57E-02 | protein phosphatase 1, regulatory (inhibitor) subunit 15B         |
| P2RY2           | ENSG00000175591 | -1.17E+00 | 2.94E-05 | 1.57E-02 | purinergic receptor P2Y, G-protein coupled, 2                     |
| SNX12           | ENSG00000147164 | 1.10E+00  | 3.08E-05 | 1.57E-02 | sorting nexin 12                                                  |
| CD93            | ENSG00000125810 | -1.13E+00 | 3.16E-05 | 1.57E-02 | CD93 molecule                                                     |
| MYO19           | ENSG00000141140 | 1.07E+00  | 3.55E-05 | 1.71E-02 | myosin XIX                                                        |
| VAMP7           | ENSG00000124333 | 1.20E+00  | 4.03E-05 | 1.85E-02 | vesicle-associated membrane protein 7                             |
| IL1R2           | ENSG00000115590 | -1.13E+00 | 4.19E-05 | 1.85E-02 | interleukin 1 receptor, type II                                   |
| IKZF3           | ENSG00000161405 | 1.14E+00  | 4.20E-05 | 1.85E-02 | IKAROS family zinc finger 3 (Aiolos)                              |
| CASK            | ENSG00000147044 | 1.07E+00  | 4.50E-05 | 1.90E-02 | calcium/calmodulin-dependent serine protein kinase (MAGUK family) |
| TNFAIP3         | ENSG00000118503 | -1.09E+00 | 4.54E-05 | 1.90E-02 | tumor necrosis factor, alpha-induced protein 3                    |
| ADAM23          | ENSG00000114948 | 1.13E+00  | 4.88E-05 | 1.98E-02 | ADAM metalloproteinase domain 23                                  |
| CYB5B           | ENSG00000103018 | 1.10E+00  | 5.51E-05 | 2.13E-02 | cytochrome b5 type B (outer mitochondrial membrane)               |
| JARID2          | ENSG00000080803 | -1.07E+00 | 5.52E-05 | 2.13E-02 | jumonji, AT rich interactive domain 2                             |
| SOAT1           | ENSG00000057252 | -1.11E+00 | 5.89E-05 | 2.22E-02 | sterol O-acyltransferase 1 (EC:2.3.1.26)                          |
| AP000679.2      | ENSG00000176984 | 1.25E+00  | 6.19E-05 | 2.26E-02 | NA                                                                |
| STX6            | ENSG00000135823 | -1.07E+00 | 6.28E-05 | 2.26E-02 | syntaphin 6                                                       |
| AC129778.1      | ENSG00000230059 | -1.10E+00 | 6.46E-05 | 2.27E-02 | NA                                                                |
| U47924.25       | ENSG00000237240 | 1.25E+00  | 6.84E-05 | 2.35E-02 | NA                                                                |
| HIST1H2BK       | ENSG00000197903 | -1.15E+00 | 8.04E-05 | 2.70E-02 | histone cluster 1, H2bk                                           |
| PRKD3           | ENSG00000115825 | -1.08E+00 | 8.99E-05 | 2.96E-02 | protein kinase D3 (EC:2.7.11.13)                                  |
| TREM1           | ENSG00000124731 | -1.28E+00 | 9.31E-05 | 3.00E-02 | triggering receptor expressed on myeloid cells 1                  |
| SPCS3           | ENSG00000129128 | 1.16E+00  | 9.61E-05 | 3.03E-02 | signal peptidase complex subunit 3 homolog (S. cerevisiae)        |
| ALDH2           | ENSG00000111275 | -1.15E+00 | 9.90E-05 | 3.03E-02 | aldehyde dehydrogenase 2 family (mitochondrial) (EC:1.2.1.3)      |
| TNFAIP2         | ENSG00000185215 | -1.13E+00 | 9.99E-05 | 3.03E-02 | tumor necrosis factor, alpha-induced protein 2                    |
| ARAP1           | ENSG00000186635 | -1.08E+00 | 1.02E-04 | 3.04E-02 | ArfGAP with RhoGAP domain, ankyrin repeat and PH domain 1         |
| MAFK            | ENSG00000198517 | -1.10E+00 | 1.08E-04 | 3.14E-02 | v-maf musculoaponeurotic fibrosarcoma oncogene homolog K (avian)  |
| RPL23           | ENSG00000125691 | 1.16E+00  | 1.10E-04 | 3.14E-02 | mitochondrial ribosomal protein L23                               |
| EXOSC1          | ENSG00000171311 | 1.09E+00  | 1.21E-04 | 3.36E-02 | exosome component 1                                               |
| NELL2           | ENSG00000184613 | 1.15E+00  | 1.22E-04 | 3.36E-02 | NEL-like 2 (chicken)                                              |
| FAM122A         | ENSG00000187866 | 1.11E+00  | 1.29E-04 | 3.51E-02 | family with sequence similarity 122A                              |
| WDR49           | ENSG00000174776 | -1.09E+00 | 1.34E-04 | 3.57E-02 | WD repeat domain 49                                               |
| MYLIP           | ENSG00000079444 | -1.08E+00 | 1.42E-04 | 3.71E-02 | myosin regulatory light chain interacting protein (EC:6.3.2.-)    |
| BCKDHB          | ENSG00000083123 | -1.11E+00 | 1.49E-04 | 3.75E-02 | branched chain keto acid dehydrogenase E1, beta polypeptide       |
| NA              | ENSG00000188666 | -1.14E+00 | 1.56E-04 | 3.75E-02 | NA                                                                |
| LRR70           | ENSG00000186105 | -1.14E+00 | 1.56E-04 | 3.75E-02 | leucine rich repeat containing 70                                 |
| PGS1            | ENSG00000087157 | -1.07E+00 | 1.57E-04 | 3.75E-02 | phosphatidylglycerophosphate synthase 1 (EC:2.7.8.5)              |
| CXorf65         | ENSG00000204165 | 1.13E+00  | 1.57E-04 | 3.75E-02 | chromosome X open reading frame 65                                |
| C6orf52         | ENSG00000137434 | -1.11E+00 | 1.58E-04 | 3.75E-02 | chromosome 6 open reading frame 52                                |
| DTWD2           | ENSG00000169570 | 1.09E+00  | 1.68E-04 | 3.94E-02 | DTW domain containing 2                                           |
| CTS2            | ENSG00000101160 | -1.09E+00 | 1.77E-04 | 4.04E-02 | cathepsin Z (EC:3.4.18.1)                                         |
| ZSWIM6          | ENSG00000130449 | -1.10E+00 | 1.78E-04 | 4.04E-02 | zinc finger, SWIM-type containing 6                               |
| RNF145          | ENSG00000145860 | -1.08E+00 | 1.85E-04 | 4.15E-02 | ring finger protein 145                                           |
| MAK             | ENSG00000111837 | -1.10E+00 | 2.03E-04 | 4.42E-02 | male germ cell-associated kinase (EC:2.7.11.22)                   |
| PIGM            | ENSG00000143315 | -1.09E+00 | 2.03E-04 | 4.42E-02 | phosphatidylinositol glycan anchor biosynthesis, class M          |
| AMFR            | ENSG00000159461 | -1.11E+00 | 2.07E-04 | 4.45E-02 | autocrine motility factor receptor (EC:6.3.2.19)                  |
| MIOS            | ENSG00000164654 | -1.08E+00 | 2.26E-04 | 4.67E-02 | missing oocyte, meiosis regulator, homolog (Drosophila)           |
| CRISPLD2        | ENSG00000103196 | -1.18E+00 | 2.26E-04 | 4.67E-02 | cysteine-rich secretory protein LCCL domain containing 2          |
| SERPINE2        | ENSG00000135919 | -1.09E+00 | 2.27E-04 | 4.67E-02 | serpin peptidase inhibitor, clade E (nexin, plasminogen activator |
| BMP6            | ENSG00000153162 | -1.15E+00 | 2.36E-04 | 4.80E-02 | bone morphogenetic protein 6                                      |
| KIAA0930        | ENSG00000100363 | -1.09E+00 | 2.45E-04 | 4.88E-02 | NA                                                                |
| HINT1           | ENSG00000169567 | 1.13E+00  | 2.47E-04 | 4.88E-02 | histidine triad nucleotide binding protein 1 (EC:3.-.-.-)         |
| C7orf66         | ENSG00000205174 | 1.12E+00  | 2.50E-04 | 4.88E-02 | chromosome 7 open reading frame 66                                |
| DUS4L           | ENSG00000105865 | -1.09E+00 | 2.64E-04 | 5.07E-02 | dihydropyrimidine synthase 4-like (S. cerevisiae)                 |
| KLHL24          | ENSG00000114796 | -1.08E+00 | 2.66E-04 | 5.07E-02 | kelch-like 24 (Drosophila)                                        |
| GALNT2          | ENSG00000143641 | -1.06E+00 | 2.70E-04 | 5.09E-02 | UDP-N-acetyl-alpha-D-galactosamine:polypeptide                    |
| RNF125          | ENSG00000101695 | 1.10E+00  | 2.79E-04 | 5.20E-02 | ring finger protein 125                                           |
| STX11           | ENSG00000135604 | -1.14E+00 | 2.87E-04 | 5.25E-02 | syntaphin 11                                                      |
| AGER            | ENSG00000204305 | -1.08E+00 | 2.89E-04 | 5.25E-02 | advanced glycosylation end product-specific receptor              |
| HSPB1           | ENSG00000106211 | 1.10E+00  | 2.92E-04 | 5.25E-02 | heat shock 27kDa protein 1                                        |
| ARF4            | ENSG00000168374 | 1.15E+00  | 3.03E-04 | 5.34E-02 | ADP-ribosylation factor 4                                         |
| TMEM116         | ENSG00000198270 | 1.11E+00  | 3.04E-04 | 5.34E-02 | transmembrane protein 116                                         |
| TNFRSF21        | ENSG00000146072 | -1.09E+00 | 3.18E-04 | 5.52E-02 | tumor necrosis factor receptor superfamily, member 21             |
| MYH13           | ENSG00000006788 | 1.07E+00  | 3.23E-04 | 5.54E-02 | myosin, heavy chain 13, skeletal muscle                           |
| TSC22D3         | ENSG00000157514 | -1.06E+00 | 3.28E-04 | 5.57E-02 | TSC22 domain family, member 3                                     |
| WDFY1           | ENSG00000085449 | -1.08E+00 | 3.40E-04 | 5.66E-02 | WD repeat and FYVE domain containing 1                            |
| RALGPS1         | ENSG00000136828 | 1.06E+00  | 3.40E-04 | 5.66E-02 | Ral GEF with PH domain and SH3 binding motif 1                    |
| ITGB7           | ENSG00000139626 | 1.09E+00  | 3.49E-04 | 5.71E-02 | integrin, beta 7                                                  |
| NDUFV2          | ENSG00000178127 | 1.16E+00  | 3.51E-04 | 5.71E-02 | NADH dehydrogenase (ubiquinone) flavoprotein 2, 24kDa (EC:1.6.5.3 |

|                |                 |           |          |          |                                                                     |
|----------------|-----------------|-----------|----------|----------|---------------------------------------------------------------------|
| OPRD1          | ENSG00000116329 | -1,11E+00 | 3,58E-04 | 5,77E-02 | opioid receptor, delta 1                                            |
| SPINK8         | ENSG00000229453 | -1,13E+00 | 3,63E-04 | 5,79E-02 | serine peptidase inhibitor, Kazal type 8 (putative)                 |
| MYCL1          | ENSG00000116990 | -1,10E+00 | 3,70E-04 | 5,84E-02 | v-myc myelocytomatosis viral oncogene homolog 1, lung carcinoma     |
| ABCD2          | ENSG00000173208 | 1,10E+00  | 4,16E-04 | 6,32E-02 | ATP-binding cassette, sub-family D (ALD), member 2                  |
| STX2           | ENSG00000111450 | 1,13E+00  | 4,18E-04 | 6,32E-02 | syntaxin 2                                                          |
| MAP3K6         | ENSG00000142733 | 1,06E+00  | 4,21E-04 | 6,32E-02 | mitogen-activated protein kinase kinase kinase 6 (EC:2.7.11.25)     |
| PLCB4          | ENSG00000101333 | -1,07E+00 | 4,21E-04 | 6,32E-02 | phospholipase C, beta 4 (EC:3.1.4.11)                               |
| DOCK3          | ENSG00000146094 | -1,13E+00 | 4,28E-04 | 6,32E-02 | docking protein 3                                                   |
| MGEA5          | ENSG00000198408 | 1,11E+00  | 4,33E-04 | 6,32E-02 | meningioma expressed antigen 5 (hyaluronidase) (EC:3.2.1.52)        |
| MTO1           | ENSG00000135297 | 1,08E+00  | 4,34E-04 | 6,32E-02 | mitochondrial translation optimization 1 homolog (S. cerevisiae)    |
| SH2B3          | ENSG00000111252 | -1,06E+00 | 4,37E-04 | 6,32E-02 | SH2B adaptor protein 3                                              |
| UNC93B1        | ENSG00000110057 | -1,11E+00 | 4,47E-04 | 6,32E-02 | unc-93 homolog B1 (C. elegans)                                      |
| C19orf28       | ENSG00000161091 | -1,07E+00 | 4,53E-04 | 6,32E-02 | chromosome 19 open reading frame 28                                 |
| VSTM1          | ENSG00000189068 | -1,18E+00 | 4,57E-04 | 6,32E-02 | V-set and transmembrane domain containing 1                         |
| SLC6A6         | ENSG00000131389 | -1,12E+00 | 4,59E-04 | 6,32E-02 | solute carrier family 6 (neurotransmitter transporter, taurine),    |
| ESRP1          | ENSG00000104413 | -1,08E+00 | 4,62E-04 | 6,32E-02 | epithelial splicing regulatory protein 1                            |
| PTRF           | ENSG00000177469 | 1,10E+00  | 4,67E-04 | 6,32E-02 | polymerase I and transcript release factor                          |
| IL23A          | ENSG00000110944 | 1,07E+00  | 4,68E-04 | 6,32E-02 | interleukin 23, alpha subunit p19                                   |
| STS            | ENSG00000101846 | -1,10E+00 | 4,72E-04 | 6,32E-02 | steroid sulfatase (microsomal), isozyme S (EC:3.1.6.2)              |
| PCYT1B         | ENSG00000102230 | -1,11E+00 | 4,74E-04 | 6,32E-02 | phosphate cytidylyltransferase 1, choline, beta (EC:2.7.7.15)       |
| MCL1           | ENSG00000143384 | -1,12E+00 | 4,74E-04 | 6,32E-02 | myeloid cell leukemia sequence 1 (BCL2-related)                     |
| CDK5RAP1       | ENSG00000101391 | 1,07E+00  | 4,92E-04 | 6,48E-02 | CDK5 regulatory subunit associated protein 1                        |
| TRPS1          | ENSG00000104447 | -1,10E+00 | 4,98E-04 | 6,48E-02 | trichorhinophalangeal syndrome I                                    |
| ZNFR12         | ENSG00000224689 | 1,15E+00  | 4,99E-04 | 6,48E-02 | zinc finger protein 812                                             |
| DAPK1          | ENSG00000196730 | -1,11E+00 | 5,03E-04 | 6,48E-02 | death-associated protein kinase 1 (EC:2.7.11.1)                     |
| TMEM110        | ENSG00000213533 | -1,10E+00 | 5,14E-04 | 6,51E-02 | transmembrane protein 110                                           |
| TMEM110-MUSTN1 | ENSG00000248592 | -1,10E+00 | 5,14E-04 | 6,51E-02 | NA                                                                  |
| JAZF1          | ENSG00000153814 | 1,09E+00  | 5,24E-04 | 6,58E-02 | JAZF zinc finger 1                                                  |
| HSPA2          | ENSG00000126803 | 1,10E+00  | 5,43E-04 | 6,77E-02 | heat shock 70kDa protein 2                                          |
| POGK           | ENSG00000143157 | -1,07E+00 | 5,62E-04 | 6,95E-02 | pogo transposable element with KRAB domain                          |
| HIST2H2BE      | ENSG00000184678 | -1,26E+00 | 5,71E-04 | 7,00E-02 | histone cluster 2, H2be                                             |
| NA             | ENSG00000141325 | 1,07E+00  | 5,83E-04 | 7,05E-02 | NA                                                                  |
| SLC43A2        | ENSG00000167703 | -1,11E+00 | 5,84E-04 | 7,05E-02 | solute carrier family 43, member 2                                  |
| MCF2L          | ENSG00000126217 | 1,05E+00  | 5,98E-04 | 7,15E-02 | MCF.2 cell line derived transforming sequence-like                  |
| ATF7IP2        | ENSG00000166669 | 1,13E+00  | 6,02E-04 | 7,15E-02 | activating transcription factor 7 interacting protein 2             |
| ABCG1          | ENSG00000160179 | -1,08E+00 | 6,06E-04 | 7,15E-02 | ATP-binding cassette, sub-family G (WHITE), member 1                |
| OR52J3         | ENSG00000205495 | 1,16E+00  | 6,22E-04 | 7,28E-02 | olfactory receptor, family 52, subfamily J, member 3                |
| ASB13          | ENSG00000196372 | 1,13E+00  | 6,34E-04 | 7,37E-02 | ankyrin repeat and SOCS box-containing 13                           |
| AGTRAP         | ENSG00000177674 | -1,10E+00 | 6,42E-04 | 7,41E-02 | angiotensin II receptor-associated protein                          |
| ETAA1          | ENSG00000143971 | 1,11E+00  | 6,58E-04 | 7,54E-02 | Ewing tumor-associated antigen 1                                    |
| CXCL16         | ENSG00000161921 | -1,18E+00 | 6,67E-04 | 7,58E-02 | chemokine (C-X-C motif) ligand 16                                   |
| SLC40A1        | ENSG00000138449 | -1,14E+00 | 6,80E-04 | 7,63E-02 | solute carrier family 40 (iron-regulated transporter), member 1     |
| PPM1G          | ENSG00000115241 | 1,07E+00  | 6,81E-04 | 7,63E-02 | protein phosphatase, Mg2+/Mn2+ dependent, 1G (EC:3.1.3.16)          |
| C19orf18       | ENSG00000177025 | 1,14E+00  | 6,97E-04 | 7,74E-02 | chromosome 19 open reading frame 18                                 |
| PTGER2         | ENSG00000125384 | 1,12E+00  | 7,05E-04 | 7,78E-02 | prostaglandin E receptor 2 (subtype EP2), 53kDa                     |
| CGDC77         | ENSG00000120647 | -1,11E+00 | 7,18E-04 | 7,87E-02 | coiled-coil domain containing 77                                    |
| PRKAG2         | ENSG00000106617 | -1,06E+00 | 7,27E-04 | 7,91E-02 | protein kinase, AMP-activated, gamma 2 non-catalytic subunit        |
| RELA           | ENSG00000173039 | 1,09E+00  | 7,64E-04 | 8,26E-02 | v-rel reticuloendotheliosis viral oncogene homolog A (avian)        |
| SGMS2          | ENSG00000164023 | -1,10E+00 | 7,92E-04 | 8,50E-02 | sphingomyelin synthase 2 (EC:2.7.8.27)                              |
| ZDHHC18        | ENSG00000204160 | 1,06E+00  | 8,10E-04 | 8,63E-02 | zinc finger, DHHC-type containing 18                                |
| AC008021.1     | ENSG00000206043 | -1,15E+00 | 8,21E-04 | 8,69E-02 | NA                                                                  |
| C2CD3          | ENSG00000168014 | 1,05E+00  | 8,51E-04 | 8,95E-02 | C2 calcium-dependent domain containing 3                            |
| EDEM3          | ENSG00000116406 | -1,08E+00 | 8,62E-04 | 8,97E-02 | ER degradation enhancer, mannosidase alpha-like 3                   |
| RIPK3          | ENSG00000129465 | 1,08E+00  | 8,80E-04 | 8,97E-02 | receptor-interacting serine-threonine kinase 3 (EC:2.7.11.1)        |
| ST14           | ENSG00000149418 | -1,08E+00 | 8,85E-04 | 8,97E-02 | suppression of tumorigenicity 14 (colon carcinoma) (EC:3.4.21.109)  |
| IRF2BP2        | ENSG00000168264 | -1,07E+00 | 8,92E-04 | 8,97E-02 | interferon regulatory factor 2 binding protein 2                    |
| CD300A         | ENSG00000167851 | -1,13E+00 | 8,94E-04 | 8,97E-02 | CD300a molecule                                                     |
| USP14          | ENSG00000101557 | 1,07E+00  | 9,10E-04 | 8,97E-02 | ubiquitin specific peptidase 14 (tRNA-guanine transglycosylase)     |
| CGDC56         | ENSG00000183978 | 1,23E+00  | 9,10E-04 | 8,97E-02 | coiled-coil domain containing 56                                    |
| MARK1          | ENSG00000116141 | 1,08E+00  | 9,12E-04 | 8,97E-02 | MAP/microtubule affinity-regulating kinase 1 (EC:2.7.11.1)          |
| C5orf17        | ENSG00000248874 | 1,11E+00  | 9,19E-04 | 8,97E-02 | NA                                                                  |
| MICAL3         | ENSG00000243156 | 1,08E+00  | 9,20E-04 | 8,97E-02 | microtubule associated monooxygenase, calponin and LIM domain       |
| EIF4ENIF1      | ENSG00000184708 | 1,05E+00  | 9,25E-04 | 8,97E-02 | eukaryotic translation initiation factor 4E nuclear import factor 1 |
| ECE1           | ENSG00000117298 | -1,08E+00 | 9,27E-04 | 8,97E-02 | endothelin converting enzyme 1 (EC:3.4.24.71)                       |
| INPP5D         | ENSG00000168918 | -1,06E+00 | 9,29E-04 | 8,97E-02 | inositol polyphosphate-5-phosphatase, 145kDa                        |
| POU3F4         | ENSG00000196767 | 1,10E+00  | 9,37E-04 | 8,99E-02 | POU class 3 homeobox 4                                              |
| MRO            | ENSG00000134042 | -1,09E+00 | 9,46E-04 | 8,99E-02 | maestro                                                             |
| RP11-698N11.3  | ENSG00000186082 | 1,11E+00  | 9,48E-04 | 8,99E-02 | NA                                                                  |
| NKX3-1         | ENSG00000167034 | 1,07E+00  | 9,58E-04 | 9,03E-02 | NK3 homeobox 1                                                      |
| DDX19A         | ENSG00000168872 | 1,08E+00  | 9,78E-04 | 9,11E-02 | DEAD (Asp-Glu-Ala-As) box polypeptide 19A                           |
| LDLR           | ENSG00000130164 | 1,09E+00  | 9,78E-04 | 9,11E-02 | low density lipoprotein receptor                                    |
| CPA4           | ENSG00000128510 | -1,08E+00 | 9,85E-04 | 9,12E-02 | carboxypeptidase A4                                                 |
| DEPDC5         | ENSG00000100150 | 1,05E+00  | 1,00E-03 | 9,21E-02 | DEP domain containing 5                                             |
| SLC26A8        | ENSG00000112053 | -1,08E+00 | 1,02E-03 | 9,26E-02 | solute carrier family 26, member 8                                  |
| ROMO1          | ENSG00000125995 | 1,15E+00  | 1,02E-03 | 9,26E-02 | reactive oxygen species modulator 1                                 |
| PARP6          | ENSG00000137817 | 1,05E+00  | 1,04E-03 | 9,40E-02 | poly (ADP-ribose) polymerase family, member 6 (EC:2.4.2.30)         |
| ARHGAP17       | ENSG00000140750 | 1,07E+00  | 1,06E-03 | 9,42E-02 | Rho GTPase activating protein 17                                    |
| MARVELD1       | ENSG00000155254 | -1,10E+00 | 1,06E-03 | 9,42E-02 | MARVEL domain containing 1                                          |
| RAP2B          | ENSG00000181467 | -1,09E+00 | 1,06E-03 | 9,42E-02 | RAP2B, member of RAS oncogene family                                |
| AC027763.2     | ENSG00000215067 | -1,08E+00 | 1,07E-03 | 9,42E-02 | NA                                                                  |
| HBM            | ENSG00000206177 | 1,15E+00  | 1,07E-03 | 9,42E-02 | hemoglobin, mu                                                      |
| SERHL2         | ENSG00000183569 | 1,11E+00  | 1,08E-03 | 9,42E-02 | serine hydrolase-like 2                                             |
| ALG12          | ENSG00000182858 | -1,06E+00 | 1,11E-03 | 9,66E-02 | asparagine-linked glycosylation 12, alpha-1,6-mannosyltransferase   |
| PLCG1          | ENSG00000124181 | 1,08E+00  | 1,12E-03 | 9,66E-02 | phospholipase C, gamma 1 (EC:3.1.4.11)                              |
| MAP3K9         | ENSG00000006432 | 1,06E+00  | 1,13E-03 | 9,66E-02 | mitogen-activated protein kinase kinase kinase 9 (EC:2.7.11.25)     |
| CLIC5          | ENSG00000112782 | 1,09E+00  | 1,14E-03 | 9,72E-02 | chloride intracellular channel 5                                    |
| RASGEF1A       | ENSG00000198915 | 1,06E+00  | 1,15E-03 | 9,75E-02 | RasGEF domain family, member 1A                                     |
| CDK20          | ENSG00000156345 | 1,08E+00  | 1,18E-03 | 9,95E-02 | cyclin-dependent kinase 20 (EC:2.7.11.22)                           |

Table S2: Differential gene expression in PBMCs between the sex and age- matched groups was identified by applying a linear mixed model. The model was adjusted for the classical cardiovascular risk factors hypertension, smoking status, body mass index, diabetes and low-density lipoprotein/high-density lipoprotein ratio n=112, FC=fold change, MI=myocardial infarction

| Table S9: Significantly differentially expressed genes between <i>Gpr15<sup>gfp/gfp</sup></i> and wildtype mice in the myocardial infarction zone. |                      |           |          |                                                                                             |
|----------------------------------------------------------------------------------------------------------------------------------------------------|----------------------|-----------|----------|---------------------------------------------------------------------------------------------|
| gene                                                                                                                                               | Ensembl_id           | log2FC    | p-value  | gene description                                                                            |
| <i>Muc16</i>                                                                                                                                       | ENSMUSG000000109564  | 3,47E+00  | 1,65E-04 | mucin 16                                                                                    |
| <i>Cxcl14</i>                                                                                                                                      | ENSMUSG000000021508  | 1,03E+00  | 6,49E-04 | chemokine (C-X-C motif) ligand 14                                                           |
| <i>Mertk</i>                                                                                                                                       | ENSMUSG000000014361  | 6,51E-01  | 8,18E-04 | c-mer proto-oncogene tyrosine kinase                                                        |
| <i>Abcb4</i>                                                                                                                                       | ENSMUSG000000042476  | -1,48E+00 | 5,27E-06 | ATP-binding cassette, sub-family B (MDR/TAP), member 4                                      |
| <i>Fam162a</i>                                                                                                                                     | ENSMUSG000000003955  | -6,43E-01 | 5,43E-06 | family with sequence similarity 162, member A                                               |
| <i>E230013L22Rik</i>                                                                                                                               | ENSMUSG000000096957  | -1,59E+00 | 4,31E-05 | RIKEN cDNA E230013L22 gene                                                                  |
| <i>Slc16a1</i>                                                                                                                                     | ENSMUSG000000032902  | -1,09E+00 | 4,43E-05 | solute carrier family 16 (monocarboxylic acid transporters), member 1                       |
| <i>4631405J19Rik</i>                                                                                                                               | ENSMUSG000000075027  | -1,74E+00 | 4,91E-05 | RIKEN cDNA 4631405J19 gene                                                                  |
| <i>Kcnj12</i>                                                                                                                                      | ENSMUSG000000042529  | -1,55E+00 | 7,08E-05 | potassium inwardly-rectifying channel, subfamily J, member 12                               |
| <i>Cap2</i>                                                                                                                                        | ENSMUSG000000021373  | -8,27E-01 | 8,05E-05 | CAP, adenylate cyclase-associated protein, 2 (yeast)                                        |
| <i>Ndufaf6</i>                                                                                                                                     | ENSMUSG000000050323  | -9,96E-01 | 9,27E-05 | NADH dehydrogenase (ubiquinone) complex I, assembly factor 6                                |
| <i>Fgf13</i>                                                                                                                                       | ENSMUSG000000003137  | -1,20E+00 | 9,58E-05 | fibroblast growth factor 13                                                                 |
| <i>Krt222</i>                                                                                                                                      | ENSMUSG000000035849  | -1,71E+00 | 9,72E-05 | keratin 222                                                                                 |
| <i>Ldhd</i>                                                                                                                                        | ENSMUSG0000000031958 | -1,11E+00 | 1,16E-04 | lactate dehydrogenase D                                                                     |
| <i>Cacnb2</i>                                                                                                                                      | ENSMUSG000000057914  | -8,32E-01 | 1,17E-04 | calcium channel, voltage-dependent, beta 2 subunit                                          |
| <i>Slc25a33</i>                                                                                                                                    | ENSMUSG000000028982  | -9,66E-01 | 1,26E-04 | solute carrier family 25, member 33                                                         |
| <i>Tmem74b</i>                                                                                                                                     | ENSMUSG000000044364  | -2,62E+00 | 1,31E-04 | transmembrane protein 74B                                                                   |
| <i>Gm6123</i>                                                                                                                                      | ENSMUSG000000103922  | -1,92E+00 | 1,33E-04 | predicted gene 6123                                                                         |
| <i>Pip5k1b</i>                                                                                                                                     | ENSMUSG000000024867  | -1,07E+00 | 1,37E-04 | phosphatidylinositol-4-phosphate 5-kinase, type 1 beta                                      |
| <i>Akap1</i>                                                                                                                                       | ENSMUSG000000018428  | -8,07E-01 | 1,43E-04 | A kinase (PRKA) anchor protein 1                                                            |
| <i>Gm17546</i>                                                                                                                                     | ENSMUSG000000078648  | -3,21E+00 | 1,55E-04 | predicted gene, 17546                                                                       |
| <i>Lgr6</i>                                                                                                                                        | ENSMUSG000000042793  | -1,31E+00 | 1,61E-04 | leucine-rich repeat-containing G protein-coupled receptor 6                                 |
| <i>Gm11716</i>                                                                                                                                     | ENSMUSG000000086298  | -1,12E+00 | 1,64E-04 | predicted gene 11716                                                                        |
| <i>Acss2</i>                                                                                                                                       | ENSMUSG000000027605  | -8,16E-01 | 1,66E-04 | acyl-CoA synthetase short-chain family member 2                                             |
| <i>Cdkl2</i>                                                                                                                                       | ENSMUSG000000029403  | -9,42E-01 | 1,88E-04 | cyclin-dependent kinase-like 2 (CDC2-related kinase)                                        |
| <i>0610040B10Rik</i>                                                                                                                               | ENSMUSG000000089889  | -1,05E+00 | 1,98E-04 | RIKEN cDNA 0610040B10 gene                                                                  |
| <i>Ube2ql1</i>                                                                                                                                     | ENSMUSG000000052981  | -1,21E+00 | 2,04E-04 | ubiquitin-conjugating enzyme E2Q family-like 1                                              |
| <i>Grb14</i>                                                                                                                                       | ENSMUSG000000026888  | -9,15E-01 | 2,04E-04 | growth factor receptor bound protein 14                                                     |
| <i>Kbtbd12</i>                                                                                                                                     | ENSMUSG000000033182  | -1,23E+00 | 2,14E-04 | kelch repeat and BTB (POZ) domain containing 12                                             |
| <i>Fhl2</i>                                                                                                                                        | ENSMUSG000000008136  | -1,16E+00 | 2,25E-04 | four and a half LIM domains 2                                                               |
| <i>Pygo1</i>                                                                                                                                       | ENSMUSG000000034910  | -8,24E-01 | 2,39E-04 | pygopus 1                                                                                   |
| <i>Atp5s</i>                                                                                                                                       | ENSMUSG000000054894  | -7,28E-01 | 2,69E-04 | ATP synthase, H <sup>+</sup> transporting, mitochondrial F0 complex, subunit S              |
| <i>Bves</i>                                                                                                                                        | ENSMUSG000000071317  | -1,07E+00 | 2,84E-04 | blood vessel epicardial substance                                                           |
| <i>Cox7c</i>                                                                                                                                       | ENSMUSG000000017778  | -6,95E-01 | 3,05E-04 | cytochrome c oxidase subunit VIc                                                            |
| <i>Smpx</i>                                                                                                                                        | ENSMUSG000000041476  | -8,88E-01 | 3,08E-04 | small muscle protein, X-linked                                                              |
| <i>Tfrc</i>                                                                                                                                        | ENSMUSG000000022797  | -1,28E+00 | 3,17E-04 | transferrin receptor                                                                        |
| <i>Ppp1r3d</i>                                                                                                                                     | ENSMUSG000000049999  | -8,52E-01 | 3,19E-04 | protein phosphatase 1, regulatory subunit 3D                                                |
| <i>Rab3ip</i>                                                                                                                                      | ENSMUSG000000064181  | -6,68E-01 | 3,19E-04 | RAB3A interacting protein                                                                   |
| <i>Klhlhc1</i>                                                                                                                                     | ENSMUSG000000051890  | -8,62E-01 | 3,22E-04 | kelch domain containing 1                                                                   |
| <i>Gm16399</i>                                                                                                                                     | ENSMUSG0000000097790 | -7,88E-01 | 3,37E-04 | predicted pseudogene 16399                                                                  |
| <i>Tmem246</i>                                                                                                                                     | ENSMUSG000000039611  | -9,89E-01 | 3,67E-04 | transmembrane protein 246                                                                   |
| <i>Esrrb</i>                                                                                                                                       | ENSMUSG000000021255  | -1,25E+00 | 4,13E-04 | estrogen related receptor, beta                                                             |
| <i>Mfn1</i>                                                                                                                                        | ENSMUSG000000027668  | -8,03E-01 | 4,13E-04 | mitofusin 1                                                                                 |
| <i>Cox6c</i>                                                                                                                                       | ENSMUSG000000014313  | -6,16E-01 | 4,18E-04 | cytochrome c oxidase subunit VIc                                                            |
| <i>Hlalr1</i>                                                                                                                                      | ENSMUSG000000085412  | -3,17E+00 | 4,61E-04 | Hoxa adjacent long noncoding RNA 1                                                          |
| <i>Timp4</i>                                                                                                                                       | ENSMUSG000000030317  | -2,10E+00 | 5,04E-04 | tissue inhibitor of metalloproteinase 4                                                     |
| <i>Armc2</i>                                                                                                                                       | ENSMUSG0000000071324 | -1,18E+00 | 5,10E-04 | armadillo repeat containing 2                                                               |
| <i>Grip2</i>                                                                                                                                       | ENSMUSG000000030098  | -1,62E+00 | 5,23E-04 | glutamate receptor interacting protein 2                                                    |
| <i>Acat1</i>                                                                                                                                       | ENSMUSG000000032047  | -7,39E-01 | 5,31E-04 | acetyl-Coenzyme A acetyltransferase 1                                                       |
| <i>Frmf5</i>                                                                                                                                       | ENSMUSG000000027238  | -1,17E+00 | 5,56E-04 | FERM domain containing 5                                                                    |
| <i>Gm43032</i>                                                                                                                                     | ENSMUSG000000106498  | -3,01E+00 | 5,72E-04 | predicted gene 43032                                                                        |
| <i>D3Erd751e</i>                                                                                                                                   | ENSMUSG000000025766  | -9,20E-01 | 5,79E-04 | DNA segment, Chr 3, ERATO Doi 751, expressed                                                |
| <i>Egln1</i>                                                                                                                                       | ENSMUSG000000031987  | -7,02E-01 | 5,79E-04 | egl-9 family hypoxia-inducible factor 1                                                     |
| <i>Usp28</i>                                                                                                                                       | ENSMUSG000000032267  | -1,05E+00 | 6,16E-04 | ubiquitin specific peptidase 28                                                             |
| <i>Mipep-ps</i>                                                                                                                                    | ENSMUSG000000093624  | -2,75E+00 | 6,21E-04 | mitochondrial intermediate peptidase, pseudogene                                            |
| <i>D830039M14Rik</i>                                                                                                                               | ENSMUSG000000043126  | -1,79E+00 | 6,26E-04 | RIKEN cDNA D830039M14 gene                                                                  |
| <i>Arhgef9</i>                                                                                                                                     | ENSMUSG000000025656  | -9,91E-01 | 6,37E-04 | CDC42 guanine nucleotide exchange factor (GEF) 9                                            |
| <i>Asb11</i>                                                                                                                                       | ENSMUSG000000031382  | -1,48E+00 | 6,56E-04 | ankyrin repeat and SOCS box-containing 11                                                   |
| <i>CU074400.1</i>                                                                                                                                  | ENSMUSG000000114254  | -9,36E-01 | 6,60E-04 | NA                                                                                          |
| <i>Gm16793</i>                                                                                                                                     | ENSMUSG000000097357  | -2,37E+00 | 6,63E-04 | predicted gene, 16793                                                                       |
| <i>Gm6238</i>                                                                                                                                      | ENSMUSG000000082996  | -1,58E+00 | 6,71E-04 | predicted pseudogene 6238                                                                   |
| <i>Cyts</i>                                                                                                                                        | ENSMUSG000000063694  | -7,64E-01 | 6,76E-04 | cytochrome c, somatic                                                                       |
| <i>Pdk1</i>                                                                                                                                        | ENSMUSG000000006494  | -5,92E-01 | 6,94E-04 | pyruvate dehydrogenase kinase, isoenzyme 1                                                  |
| <i>2210408F21Rik</i>                                                                                                                               | ENSMUSG000000087380  | -7,06E-01 | 7,03E-04 | RIKEN cDNA 2210408F21 gene                                                                  |
| <i>Ndufb2</i>                                                                                                                                      | ENSMUSG000000002416  | -6,10E-01 | 7,26E-04 | NADH dehydrogenase (ubiquinone) 1 beta subcomplex, 2                                        |
| <i>Gm10053</i>                                                                                                                                     | ENSMUSG000000058927  | -7,19E-01 | 7,43E-04 | predicted gene 10053                                                                        |
| <i>Eml6</i>                                                                                                                                        | ENSMUSG000000044072  | -1,38E+00 | 7,44E-04 | echinoderm microtubule associated protein like 6                                            |
| <i>Nlrp10</i>                                                                                                                                      | ENSMUSG000000049709  | -1,08E+00 | 7,46E-04 | NLR family, pyrin domain containing 10                                                      |
| <i>Slc25a4</i>                                                                                                                                     | ENSMUSG000000031633  | -9,71E-01 | 7,51E-04 | solute carrier family 25 (mitochondrial carrier, adenine nucleotide translocator), member 4 |
| <i>Ppif</i>                                                                                                                                        | ENSMUSG0000000021868 | -1,06E+00 | 7,94E-04 | peptidylprolyl isomerase F (cyclophilin F)                                                  |
| <i>Gm26672</i>                                                                                                                                     | ENSMUSG000000097330  | -2,20E+00 | 8,05E-04 | predicted gene, 26672                                                                       |
| <i>Kcnd2</i>                                                                                                                                       | ENSMUSG000000060882  | -1,79E+00 | 8,05E-04 | potassium voltage-gated channel, Shal-related family, member 2                              |
| <i>Gm17021</i>                                                                                                                                     | ENSMUSG000000091661  | -1,40E+00 | 8,21E-04 | predicted gene 17021                                                                        |
| <i>Pacsin3</i>                                                                                                                                     | ENSMUSG000000027257  | -7,54E-01 | 8,45E-04 | protein kinase C and casein kinase substrate in neurons 3                                   |
| <i>6430571L13Rik</i>                                                                                                                               | ENSMUSG000000037977  | -1,89E+00 | 8,60E-04 | RIKEN cDNA 6430571L13 gene                                                                  |
| <i>Scn5a</i>                                                                                                                                       | ENSMUSG000000032511  | -7,42E-01 | 8,71E-04 | sodium channel, voltage-gated, type V, alpha                                                |
| <i>Did</i>                                                                                                                                         | ENSMUSG000000020664  | -6,52E-01 | 8,81E-04 | dihydropyrimidine dehydrogenase                                                             |
| <i>Lppos</i>                                                                                                                                       | ENSMUSG000000097867  | -6,12E-01 | 8,86E-04 | LIM domain containing preferred translocation partner in lipoma, opposite strand            |
| <i>Mterf2</i>                                                                                                                                      | ENSMUSG000000049038  | -9,85E-01 | 9,28E-04 | mitochondrial transcription termination factor 2                                            |
| <i>Cavin4</i>                                                                                                                                      | ENSMUSG000000028348  | -1,32E+00 | 9,44E-04 | caveolae associated 4                                                                       |
| <i>Mdh1</i>                                                                                                                                        | ENSMUSG000000020321  | -8,58E-01 | 9,52E-04 | malate dehydrogenase 1, NAD (soluble)                                                       |
| <i>Trp53inp2</i>                                                                                                                                   | ENSMUSG000000038375  | -6,80E-01 | 9,65E-04 | transformation related protein 53 inducible nuclear protein 2                               |
| <i>Acyp2</i>                                                                                                                                       | ENSMUSG000000060923  | -7,28E-01 | 9,78E-04 | acylphosphatase 2, muscle type                                                              |
| <i>Nebi</i>                                                                                                                                        | ENSMUSG000000053702  | -8,90E-01 | 9,82E-04 | nebulin                                                                                     |

Table S9: Differential cardiac gene expression between *Gpr15<sup>gfp/gfp</sup>* and wildtype mice was calculated using DESeq2. n=8/9, FC=fold change
